# Supplementary material for: Ancient and modern mechanisms compete in progesterone receptor activation
Source: Royal Society of Chemistry journal article supplement (doi:10.1039/d4cb00002a), 2024-01-01
Supplement: d4cb00002a1.pdf [file d4cb00002a1.pdf]

## SUPPORTING INFORMATION

### **ANCIENT AND MODERN MECHANISMS COMPETE IN PROGESTERONE RECEPTOR ACTIVATION**

Sabab H. Khan<sup>1</sup>, Namita Dube<sup>1</sup>, Nishanti Sudhakar<sup>1</sup>, Olivia Fraser<sup>1</sup>, Priscilla Villalona<sup>1</sup>, Sean M. Braet<sup>2</sup>, Stephanie Leedom<sup>1</sup>, Erin R. Reilly<sup>1</sup>, Jacob Sivak<sup>2</sup>, Kenidee Crittenden<sup>2</sup>, C. Denise Okafor<sup>1,2\*</sup>

<sup>1</sup>Department of Biochemistry and Molecular Biology, Pennsylvania State University, University Park, PA, 16802, USA

<sup>2</sup>Department of Chemistry, Pennsylvania State University, University Park, PA, 16802, USA

\*Email: [cdo5093@psu.edu](mailto:cdo5093@psu.edu)

**Figure S1.** Structures, names and 3-letter symbols of the steroidal ligands used in the study

Inactive ligands

|                                                                                   |                                                                                   |                                                                                   |                                                                                    |                                                                                     |
|-----------------------------------------------------------------------------------|-----------------------------------------------------------------------------------|-----------------------------------------------------------------------------------|------------------------------------------------------------------------------------|-------------------------------------------------------------------------------------|
| 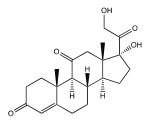 |  |  |  |  |
| Cortisone (PD0)                                                                   | Dexamethasone (DEX)                                                               | Prednisone (PDN)                                                                  | Fludrocortisone (ZK5)                                                              | 17-alpha-hydroxyprogesterone (17A)                                                  |
|  |  |                                                                                   |                                                                                    |                                                                                     |
| Dehydroepiandrosterone (AND)                                                      | Estrone (J3Z)                                                                     |                                                                                   |                                                                                    |                                                                                     |

Weak potency ligands

|                                                                                    |                                                                                    |                                                                                    |                                                                                     |                                                                                      |
|------------------------------------------------------------------------------------|------------------------------------------------------------------------------------|------------------------------------------------------------------------------------|-------------------------------------------------------------------------------------|--------------------------------------------------------------------------------------|
| 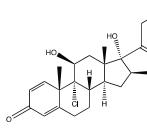  |   |   |   |   |
| Beclomethasone (BLX)                                                               | Testosterone (TES)                                                                 | Cortisol (HCY)                                                                     | Betamethasone (BM0)                                                                 | Estradiol (EST)                                                                      |
|  |  |  |  |  |
| Aldosterone (AS4)                                                                  | Spironolactone (SNL)                                                               | R1881 (R18)                                                                        | 17-alpha-ethinyl-estradiol (3WF)                                                    | Dihydrotestosterone (DHT)                                                            |

Moderate potency ligands

|                                                                                     |                                                                                     |                                                                                     |                                                                                      |                                                                                       |
|-------------------------------------------------------------------------------------|-------------------------------------------------------------------------------------|-------------------------------------------------------------------------------------|--------------------------------------------------------------------------------------|---------------------------------------------------------------------------------------|
| 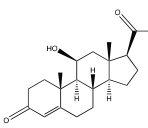 |  |  |  |  |
| Corticosterone (COR)                                                                | Loteprednol etabonate (LE8)                                                         | Triamcinolone (1TA)                                                                 | Fluticasone propionate (FLP)                                                         | Budesonide (BUD)                                                                      |

High potency ligands

|                                                                                     |                                                                                     |                                                                                     |                                                                                      |                                                                                       |
|-------------------------------------------------------------------------------------|-------------------------------------------------------------------------------------|-------------------------------------------------------------------------------------|--------------------------------------------------------------------------------------|---------------------------------------------------------------------------------------|
| 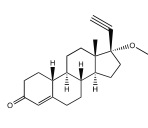 |  |  |  |  |
| Norethindrone acetate (ND0)                                                         | Megestrol Acetate (MUZ)                                                             | Norethindrone (NDR)                                                                 | Ethisterone (ET0)                                                                    | Medroxyprogesterone (MP0)                                                             |
|  |  |  |  |  |
| Gestodene (GE0)                                                                     | Cyproterone acetate (CA4)                                                           | Progesterone (STR)                                                                  | Promegestone (P0M)                                                                   | Mometasone furoate (MOF)                                                              |

| Ligands                      | 3 letter symbol | EC <sub>50</sub> values (μM) |             |             |
|------------------------------|-----------------|------------------------------|-------------|-------------|
|                              |                 | Reference 1                  | Reference 2 | Reference 3 |
| Cortisone                    | PD0             |                              |             | >10         |
| Dexamethasone                | DEX             |                              | 4.78        | >10         |
| Prednisone                   | PDN             |                              |             | >10         |
| Fludrocortisone              | ZK5             |                              |             | >10         |
| 17-alpha-hydroxyprogesterone | 17A             |                              | >10         |             |
| DHEA                         | AND             |                              |             | >10         |
| Estrone                      | J3Z             |                              |             | >10         |
| Beclomethasone               | BLX             |                              | 6.30        |             |
| Testosterone                 | TES             | 6.26                         | 0.05        | 0.15        |
| Cortisol                     | HCY             | 6.16                         |             | >10         |
| Betamethasone                | BM0             |                              | 4.78        |             |
| Estradiol                    | EST             | 3.18                         | 0.91        | 3.60        |
| Aldosterone                  | AS4             |                              | 1.12        | 0.71        |
| Spirolactone                 | SNL             |                              | 0.56        | 0.94        |
| R1881                        | R18             |                              |             | 0.78        |
| 17-alpha-ethinylestradiol    | 3WF             | 0.40                         |             |             |
| Dihydrotestosterone          | DHT             |                              | 0.39        | 1.21        |
| Corticosterone               | COR             |                              | 7.20E-02    | 9.00E-03    |
| Loteprednol Etabonate        | LE8             | 2.00E-02                     |             |             |
| Triamcinolone                | 1TA             | 6.00E-03                     | 5.88E-02    |             |
| Fluticasone Propionate       | FLP             | 4.00E-03                     |             |             |
| Budesonide                   | BUD             | 3.00E-03                     |             |             |
| Norethindrone acetate        | ND0             | 2.00E-03                     |             |             |
| Megestrol Acetate            | MUZ             | 1.00E-03                     |             |             |
| Norethindrone                | NDR             | 1.00E-03                     |             | 1.00E+01    |
| Ethisterone                  | ETO             |                              |             | 9.19E-04    |
| Medroxyprogesterone          | MPO             | 4.00E-04                     |             |             |
| Gestodene                    | GEO             | 3.00E-04                     |             |             |
| Cyproterone acetate          | CA4             |                              | 7.90E-04    | 2.00E-04    |
| Progesterone                 | STR             |                              | 3.89E-05    | 2.50E-03    |
| Promegestone                 | POM             |                              | 1.28E-05    | 2.90E-05    |
| Mometasone                   | MOF             |                              |             | 1.20E-05    |

**Table S1.** EC<sub>50</sub> values of 32 ligands in this study are derived from **Ref 1:** Fan et al, Toxicological Sciences, 2015. **145**(2): p. 283-295, **Ref 2:** Sedlák et al, Comb Chem High Throughput Screen, 2011. **14**(4): p. 248-66., **Ref 3:** Wilkinson et al, SLAS Discovery, 2008. **13**(8): p. 755-765.

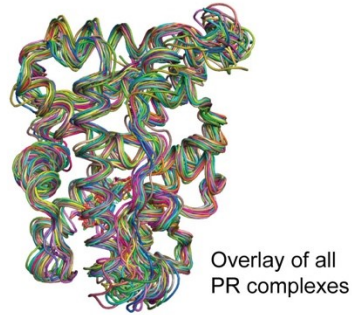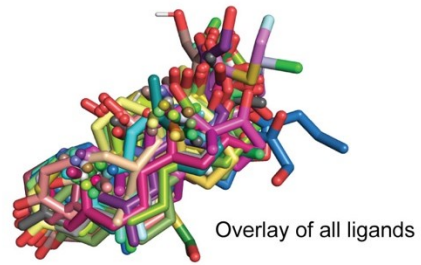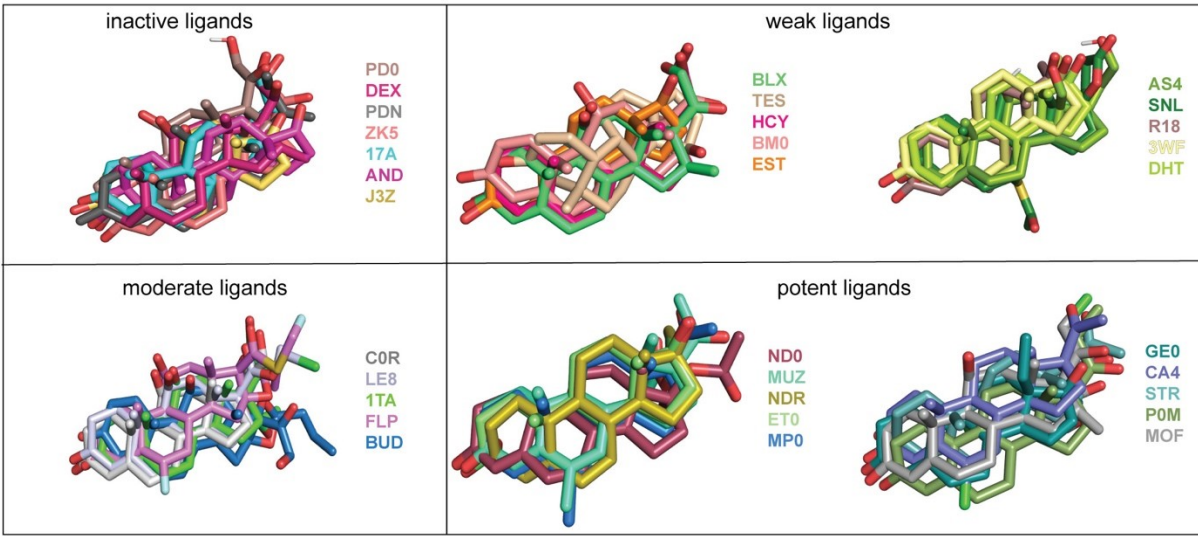

**Figure S2.** Representative structures of PR-ligand complexes are superposed to reveal binding orientation of steroid hormones. Ligands are also extracted from the complexes and shown separately, grouped by ligand class. All steroidal ligands retain the same orientation and position within the binding pocket.

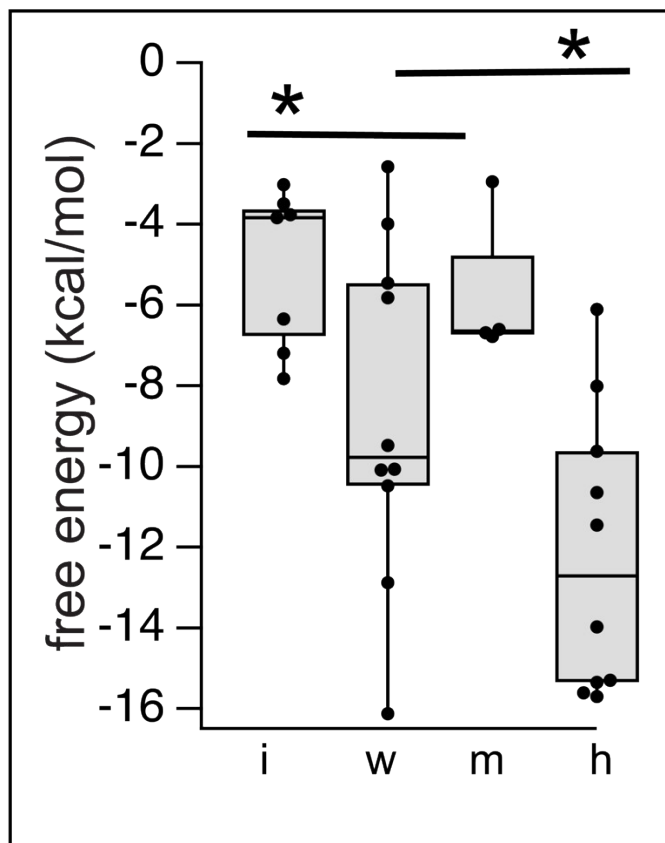

**Figure S3.** Free energy calculations using MM-PBSA reveal a relationship between potency and binding energy. Compared to all other ligands, inactive ligands and high potency ligands displayed significantly higher and lower free energies respectively. (\*,  $p < 0.05$  by two-tailed, unpaired t-test)

| RE S | F794       | L797       | L887       | C891       | V903       | F905       | M909   | I913   | N719       | M756       | L763       | R766       | F778       |
|------|------------|------------|------------|------------|------------|------------|--------|--------|------------|------------|------------|------------|------------|
| 17A  | 23.10<br>5 | 21.42<br>7 | 13.61<br>6 | 13.53<br>6 | 28.95<br>0 | 25.46<br>0 | 4.764  | 0.136  | 18.67<br>8 | 6.873      | 2.844      | 42.23<br>9 | 23.77<br>2 |
| AND  | 27.55<br>6 | 20.41<br>2 | 13.91<br>5 | 13.58<br>6 | 7.899      | 32.64<br>1 | 1.738  | 5.297  | 5.001      | 4.883      | 5.946      | 62.38<br>9 | 27.75<br>9 |
| DEX  | 19.11<br>1 | 23.18<br>9 | 18.15<br>2 | 16.08<br>7 | 32.22<br>6 | 26.31<br>4 | 3.101  | -0.177 | 20.82<br>8 | 7.437      | 3.088      | 52.60<br>3 | 25.25<br>8 |
| J3Z  | 18.03<br>3 | 18.87<br>2 | 13.01<br>6 | 13.90<br>6 | 15.69<br>7 | 33.31<br>7 | 2.648  | 4.507  | 13.30<br>3 | 5.613      | 3.349      | 67.03<br>6 | 19.11<br>3 |
| PDN  | 38.18<br>2 | 22.36<br>7 | 17.73<br>5 | 12.70<br>0 | 2.993      | 21.53<br>6 | -1.172 | 0.353  | -9.962     | 4.838      | 3.369      | 65.83<br>7 | 23.43<br>7 |
| PD0  | 20.41<br>6 | 22.64<br>5 | 14.82<br>2 | 12.74<br>3 | 32.88<br>6 | 26.17<br>7 | 4.225  | -1.111 | 19.51<br>2 | -0.243     | 6.214      | 51.19<br>6 | 28.20<br>6 |
| ZK5  | 36.38<br>2 | 14.49<br>2 | 13.22<br>3 | 13.65<br>2 | 4.895      | 21.13<br>1 | 2.795  | 0.774  | -7.370     | 0.251      | -0.641     | 55.09<br>9 | 18.71<br>7 |
| TES  | 32.27<br>8 | 16.79<br>1 | 15.30<br>6 | 12.46<br>6 | 9.106      | 24.62<br>7 | -1.463 | -0.198 | -1.235     | 6.244      | -1.125     | 61.87<br>1 | 21.11<br>5 |
| SNL  | 27.84<br>2 | 18.63<br>7 | 9.061<br>2 | 11.98<br>2 | 6.651      | 22.60<br>1 | 2.996  | 1.432  | -4.823     | 4.105      | -7.263     | 66.47<br>5 | 19.12<br>4 |
| HCY  | 35.02<br>1 | 18.68<br>3 | 14.30<br>5 | 14.45<br>4 | 13.96<br>0 | 22.53<br>7 | 3.228  | 0.877  | 2.688      | 0.984      | -0.278     | 62.28<br>1 | 23.06<br>5 |
| EST  | 36.85<br>9 | 19.17<br>3 | 16.36<br>3 | 11.21<br>5 | 6.355      | 24.41<br>1 | -2.776 | 1.626  | -3.090     | 9.975      | -2.183     | 59.95<br>5 | 17.59<br>2 |
| DHT  | 28.84<br>4 | 20.22<br>6 | 14.98<br>0 | 13.50<br>0 | 10.51<br>8 | 27.81<br>5 | 0.663  | 2.544  | 3.048      | 5.025      | 1.147      | 55.33<br>6 | 22.37<br>3 |
| BM0  | 38.88<br>9 | 23.96<br>0 | 13.09<br>9 | 16.47<br>9 | 5.262      | 26.45<br>7 | 4.291  | 4.053  | -4.884     | 0.748      | 6.893      | 69.00<br>6 | 21.25<br>0 |
| R18  | 30.47<br>2 | 21.44<br>8 | 13.60<br>2 | 11.66<br>0 | 11.22<br>4 | 26.16<br>7 | -3.437 | 0.660  | 3.624      | 3.890      | -6.410     | 47.64<br>0 | 15.32<br>9 |
| BLX  | 27.87<br>8 | 21.50<br>8 | 16.38<br>6 | 15.67<br>7 | 13.58<br>2 | 27.43<br>5 | -0.178 | 4.708  | 1.071      | 9.190      | 5.477      | 56.74<br>0 | 22.95<br>9 |
| AS4  | 29.90<br>8 | 14.61<br>2 | 11.66<br>3 | 11.05<br>4 | 9.160      | 32.81<br>2 | 0.275  | 2.655  | 0.727      | 1.574      | 2.333      | 67.38<br>5 | 24.33<br>2 |
| 3WF  | 28.59<br>4 | 18.44<br>1 | 15.05<br>1 | 11.84<br>8 | 15.29<br>0 | 24.35<br>4 | -2.709 | 2.046  | 6.329      | 8.815      | -2.842     | 61.17<br>8 | 16.71<br>2 |
| 1TA  | 27.90<br>5 | 16.86<br>9 | 14.04<br>8 | 12.31<br>3 | 12.86<br>8 | 26.55<br>0 | 2.294  | 2.111  | 0.736      | 4.841      | 3.096      | 50.78<br>3 | 23.17<br>7 |
| C0R  | 21.02<br>8 | 16.56<br>3 | 14.14<br>3 | 14.39<br>6 | 9.349      | 32.60<br>0 | 3.193  | 3.474  | 2.968      | 5.761      | 2.412      | 61.58<br>2 | 24.24<br>8 |
| LE8  | 23.46<br>4 | 12.81<br>3 | 19.37<br>3 | 20.18<br>3 | 37.43<br>9 | 41.90<br>0 | -0.612 | 7.609  | 26.75<br>4 | 15.65<br>1 | 7.885      | 60.94<br>6 | 25.88<br>3 |
| BUD  | 22.77<br>4 | 28.63<br>4 | 22.48<br>6 | 18.69<br>7 | 28.86<br>5 | 39.79<br>6 | 2.322  | 6.037  | 18.27<br>8 | 10.53<br>5 | 11.22<br>2 | 61.41<br>4 | 29.80<br>5 |
| FLP  | 30.04<br>2 | 12.95<br>2 | 18.52<br>1 | 17.78<br>8 | 52.01<br>3 | 47.98<br>2 | 2.615  | 8.314  | 42.99<br>8 | 14.48<br>2 | 2.567      | 48.88<br>5 | 22.21<br>3 |
| CA4  | 13.56<br>0 | 11.32<br>2 | 17.39<br>0 | 17.83<br>6 | 22.07<br>4 | 35.91<br>4 | 2.670  | 3.885  | 23.70<br>9 | 15.79<br>4 | 1.911      | 58.35<br>2 | 22.52<br>3 |
| ET0  | 23.54<br>9 | 35.46<br>9 | 12.86<br>2 | 13.11<br>2 | 3.449      | 19.12<br>8 | 4.297  | -2.674 | 0.545      | -3.378     | -3.514     | 47.95<br>6 | 17.59<br>8 |
| GE0  | 23.66<br>7 | 23.95<br>3 | 14.30<br>5 | 7.129      | 2.066      | 16.09<br>5 | -2.753 | -4.064 | -5.119     | -4.481     | -8.372     | 37.64<br>0 | 11.01<br>8 |
| MP0  | 26.09<br>4 | 20.99<br>5 | 16.82<br>6 | 14.77<br>3 | 34.09<br>7 | 29.72<br>1 | 6.253  | 1.968  | 25.10<br>4 | 6.118      | 1.491      | 58.69<br>3 | 23.24<br>9 |
| NDR  | 27.28<br>1 | 19.21<br>7 | 14.56<br>2 | 12.64<br>4 | 14.41<br>5 | 30.62<br>5 | -0.290 | 4.412  | 6.602      | 13.38<br>1 | -7.464     | 41.19<br>1 | 14.59<br>4 |
| P0M  | 24.39<br>8 | 20.75<br>3 | 14.94<br>7 | 12.03<br>2 | 12.64<br>2 | 31.88<br>0 | 4.406  | 2.572  | 15.31<br>4 | 1.114      | -4.662     | 50.61<br>4 | 16.50<br>5 |
| STR  | 23.72<br>9 | 24.13<br>0 | 18.17<br>5 | 12.60<br>9 | 16.13<br>0 | 26.72<br>5 | 3.207  | -2.356 | 16.12<br>4 | 7.607      | 0.081      | 62.37<br>5 | 21.78<br>0 |
| ND0  | 25.82<br>4 | 22.74<br>1 | 15.67<br>2 | 9.768      | 12.70<br>0 | 28.76<br>4 | 6.656  | 7.805  | 19.39<br>3 | 11.58<br>4 | -8.632     | 47.07<br>4 | 15.14<br>9 |
| MUZ  | 26.21<br>3 | 17.59<br>4 | 14.34<br>0 | 14.56<br>4 | 29.02<br>8 | 31.39<br>9 | 4.038  | 2.420  | 23.93<br>7 | 8.654      | 3.281      | 61.74<br>2 | 22.94<br>0 |
| MOF  | 25.13<br>4 | 23.31<br>8 | 19.34<br>9 | 13.96<br>0 | 9.912      | 24.34<br>8 | 5.177  | 2.310  | -3.281     | 1.758      | 0.657      | 52.03<br>8 | 18.65<br>0 |

**Table S2:** Solvent accessible surface area calculation of binding pocket residues. Ligands are grouped by class (inactive, weak, moderate and high potency). Units are Å<sup>2</sup>.

| RES | N719  | M756  | L763  | R766  | F778  | F794  | L797  | L887  | C891  | T894  | V903  | F905  | M909  | I913  |
|-----|-------|-------|-------|-------|-------|-------|-------|-------|-------|-------|-------|-------|-------|-------|
| 17A | -0.65 | -1.29 | -1.01 | -0.21 | -1.20 | -0.07 | -1.33 | -1.02 | -1.30 | -0.52 | -0.09 | -0.77 | -0.84 | -0.11 |
| PD0 | -1.52 | -1.54 | -1.11 | -0.25 | -1.23 | -0.23 | -1.05 | -1.13 | -1.29 | -0.85 | -0.31 | -0.66 | -0.78 | -0.12 |
| DEX | -1.76 | -1.16 | -0.96 | -0.17 | -0.88 | -0.11 | -1.49 | -1.03 | -1.19 | -0.98 | -0.55 | -1.03 | -1.01 | -0.18 |
| ZK5 | -1.68 | -1.88 | -0.99 | -0.12 | -1.51 | -0.34 | -0.93 | -1.18 | -1.43 | -1.32 | -0.33 | -0.49 | -0.66 | -0.11 |
| AND | -0.15 | -1.38 | -1.00 | -0.09 | -0.90 | -0.08 | -0.86 | -1.41 | -1.08 | -0.12 | -0.06 | -0.37 | -0.66 | -0.17 |
| J3Z | -0.22 | -1.24 | -1.10 | -0.09 | -1.43 | -0.05 | -0.89 | -1.27 | -1.04 | -0.06 | -0.02 | -0.23 | -0.64 | -0.12 |
| PDN | -2.26 | -1.50 | -0.79 | -0.24 | -1.04 | -0.40 | -0.46 | -1.49 | -1.56 | -1.13 | -0.33 | -0.35 | -0.67 | -0.13 |
| BLX | -2.59 | -1.37 | -0.78 | -0.07 | -1.10 | -0.42 | -1.03 | -1.55 | -1.55 | -0.96 | -0.39 | -0.60 | -0.79 | -0.09 |
| TES | -0.74 | -1.52 | -1.04 | -0.35 | -1.16 | -0.14 | -0.78 | -0.80 | -1.20 | -0.73 | -0.08 | -0.32 | -0.76 | -0.27 |
| 3WF | -1.33 | -0.92 | -1.10 | -0.37 | -1.47 | -0.31 | -0.72 | -1.24 | -1.48 | -0.69 | -0.21 | -0.35 | -0.64 | -0.13 |
| DHT | -0.85 | -1.36 | -0.96 | -0.09 | -1.24 | -0.13 | -0.83 | -0.95 | -1.22 | -0.81 | -0.19 | -0.38 | -0.79 | -0.20 |
| AS4 | -1.59 | -1.71 | -0.87 | -0.20 | -1.01 | -0.15 | -0.95 | -1.13 | -1.37 | -1.16 | -0.35 | -0.68 | -0.93 | -0.30 |
| EST | -1.10 | -0.86 | -1.17 | -0.40 | -1.45 | -0.17 | -0.67 | -1.17 | -1.53 | -0.50 | -0.11 | -0.22 | -0.62 | -0.16 |
| BM0 | -2.05 | -1.88 | -0.90 | -0.13 | -1.13 | -0.30 | -1.07 | -1.53 | -1.64 | -1.10 | -0.26 | -0.34 | -0.70 | -0.10 |
| HCY | -1.86 | -1.44 | -0.76 | 0.03  | -0.86 | -0.19 | -1.04 | -1.11 | -1.46 | -0.89 | -0.37 | -0.84 | -0.89 | -0.12 |
| SNL | -0.58 | -2.01 | -1.56 | -0.15 | -1.55 | -1.32 | -1.09 | -1.65 | -1.90 | -1.26 | -0.18 | -0.37 | -0.72 | -0.15 |
| R18 | -1.14 | -1.24 | -1.08 | -0.81 | -1.47 | -0.09 | -0.72 | -0.92 | -1.24 | -0.62 | -0.09 | -0.24 | -0.59 | -0.21 |
| LE8 | -1.29 | -1.05 | -0.57 | -0.01 | -0.61 | -0.80 | -1.95 | -0.82 | -1.18 | -1.28 | -0.76 | -1.50 | -0.70 | -0.30 |
| C0R | -1.07 | -1.60 | -1.01 | -0.25 | -1.10 | -0.10 | -1.09 | -1.14 | -1.33 | -1.46 | -0.48 | -0.58 | -0.70 | -0.18 |
| 1TA | -1.84 | -1.59 | -0.97 | -0.28 | -1.05 | -0.19 | -1.20 | -1.86 | -1.34 | -1.52 | -0.38 | -0.58 | -0.72 | -0.25 |
| FLP | -1.88 | -1.31 | -0.87 | -0.11 | -0.87 | -0.28 | -2.13 | -0.87 | -0.98 | -1.47 | -0.82 | -1.23 | -0.81 | -0.58 |
| ET0 | -0.41 | -1.70 | -1.12 | -0.62 | -1.68 | -0.64 | -0.41 | -1.35 | -1.47 | -0.46 | -0.13 | -0.09 | -0.66 | -0.15 |
| MUZ | -0.64 | -1.24 | -0.86 | -0.08 | -1.10 | -0.45 | -1.40 | -1.01 | -1.21 | -0.62 | -0.25 | -1.03 | -0.75 | -0.15 |
| GE0 | -1.01 | -1.40 | -1.05 | -0.75 | -1.72 | -0.26 | -0.70 | -1.02 | -1.92 | -0.64 | -0.17 | -0.24 | -0.58 | -0.36 |
| CA4 | -2.15 | -1.05 | -0.80 | -0.01 | -0.91 | -0.29 | -2.03 | -0.64 | -1.06 | -1.00 | -0.71 | -1.53 | -0.99 | -0.27 |
| NDR | -1.13 | -1.16 | -1.01 | -0.61 | -1.62 | -0.18 | -0.92 | -0.93 | -1.31 | -0.78 | -0.11 | -0.29 | -0.67 | -0.22 |
| STR | -1.17 | -1.34 | -0.93 | -0.22 | -1.04 | -0.12 | -1.00 | -0.89 | -1.28 | -0.71 | -0.29 | -0.77 | -0.85 | -0.15 |
| MOF | -1.04 | -1.80 | -1.14 | -0.42 | -1.62 | -1.52 | -1.58 | -1.35 | -1.55 | -0.56 | -0.24 | -0.93 | -0.79 | -0.14 |
| MP0 | -0.76 | -1.19 | -0.95 | -0.05 | -0.95 | -0.03 | -1.43 | -0.93 | -1.13 | -0.81 | -0.21 | -0.97 | -0.83 | -0.14 |
| ND0 | -1.45 | -1.12 | -1.02 | -0.60 | -1.55 | -0.11 | -0.95 | -0.78 | -1.40 | -0.97 | -0.18 | -1.29 | -0.87 | -0.27 |
| P0M | -0.42 | -1.50 | -0.97 | -0.57 | -1.29 | -0.20 | -0.68 | -1.04 | -1.57 | -0.67 | -0.25 | -0.71 | -0.69 | -0.11 |

**Table S3:** Per-Residue decomposition of binding energies calculated using MM-PBSA. Ligand binding pocket residues are considered in this analysis. Units are kcal/mol.

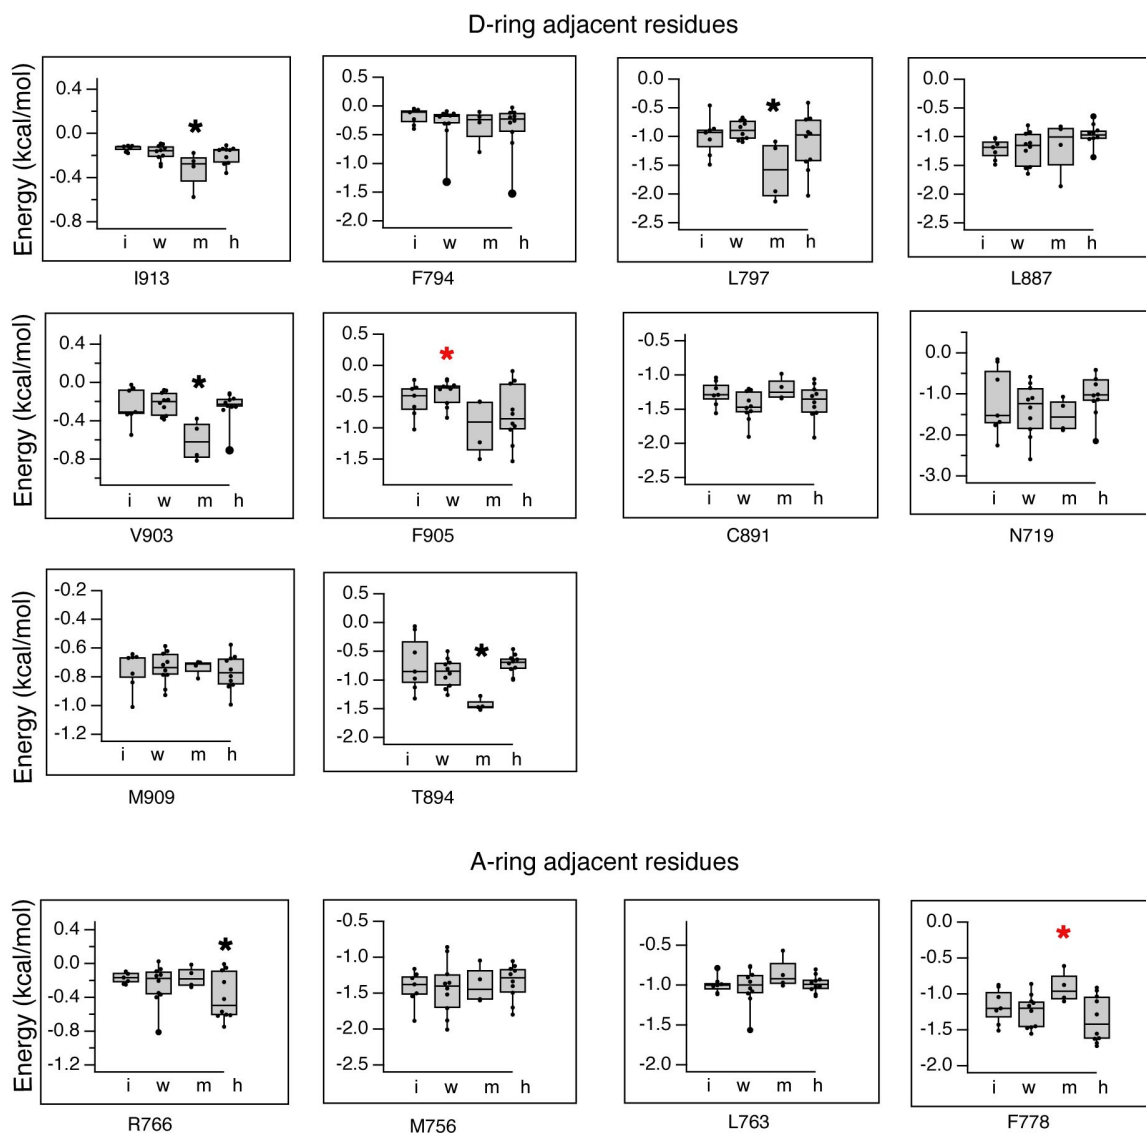

**Figure S4. Per-residue decomposition of binding energies calculated by MM-PBSA.** Ligand binding pocket residues are considered in this analysis. Values are compared by ligand class and two-tailed unpaired t-tests are used to determine whether energy contributions are significantly lower (black \*) or higher (red \*) in a given class compared to all other ligands. (significance \* is defined as  $p < 0.05$ ).



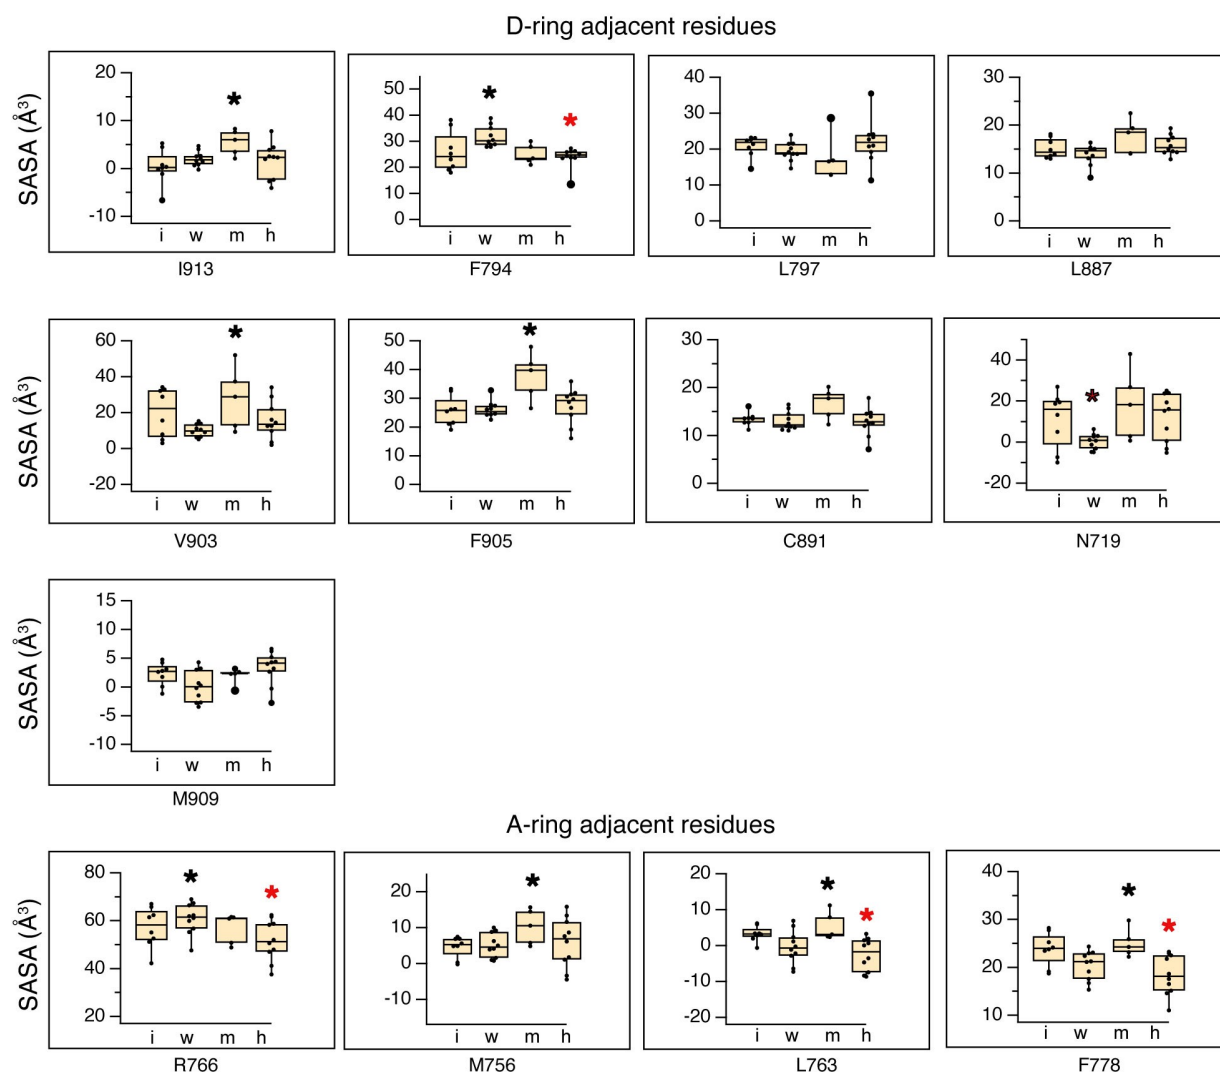

**Figure S5.** Solvent accessible surface area calculation of binding pocket residues. Ligands are grouped by class (inactive, weak, moderate and high potency). Ligand binding pocket residues are considered in this analysis. Values are compared by ligand class and two-tailed unpaired t-tests are used to determine whether residues in a given class are more exposed (black \*) or less exposed (red \*) compared to all other ligands. (significance \* is defined as  $p < 0.05$ ).

| Acceptor residue | atom | Donor residue | atom | Significant class 1    |                           |               | Significant class 2    |                           |               |
|------------------|------|---------------|------|------------------------|---------------------------|---------------|------------------------|---------------------------|---------------|
|                  |      |               |      | Ligand class (potency) | Direction of significance | Avg occupancy | Ligand class (potency) | Direction of significance | Avg occupancy |
| E904             | O    | N719          | ND2  | weak                   | high                      | 0.51          | moderate               | low                       | 0.18          |
| L901             | O    | S712          | OG   | weak                   | high                      | 0.36          | moderate               | low                       | 0.14          |
| Y777             | O    | R766          | NE   | high                   | high                      | 0.144         |                        |                           |               |
| D709             | OD1  | R788          | NE   | moderate               | high                      | 0.15          |                        |                           |               |
| L827             | O    | R845          | NH1  | weak                   | high                      | 0.11          | high                   | low                       | 0.0135        |
| G773             | O    | W802          | NE1  | weak                   | high                      | 0.38          |                        |                           |               |
| S793             | OG   | Y890          | OH   | weak                   | high                      | 0.17          |                        |                           |               |
| L929             | O    | R845          | NH2  | weak                   | low                       | 0.217         |                        |                           |               |

**Table S4.** Hydrogen bonds with significant differences in occupancies for individual ligand classes. Eight unique hydrogen bonds were observed in this category. The highest two occupancies were hydrogen bonds between H3 and L11/12. Both had significantly higher occupancy in weak agonists and significantly lower occupancy in moderate potency agonists.

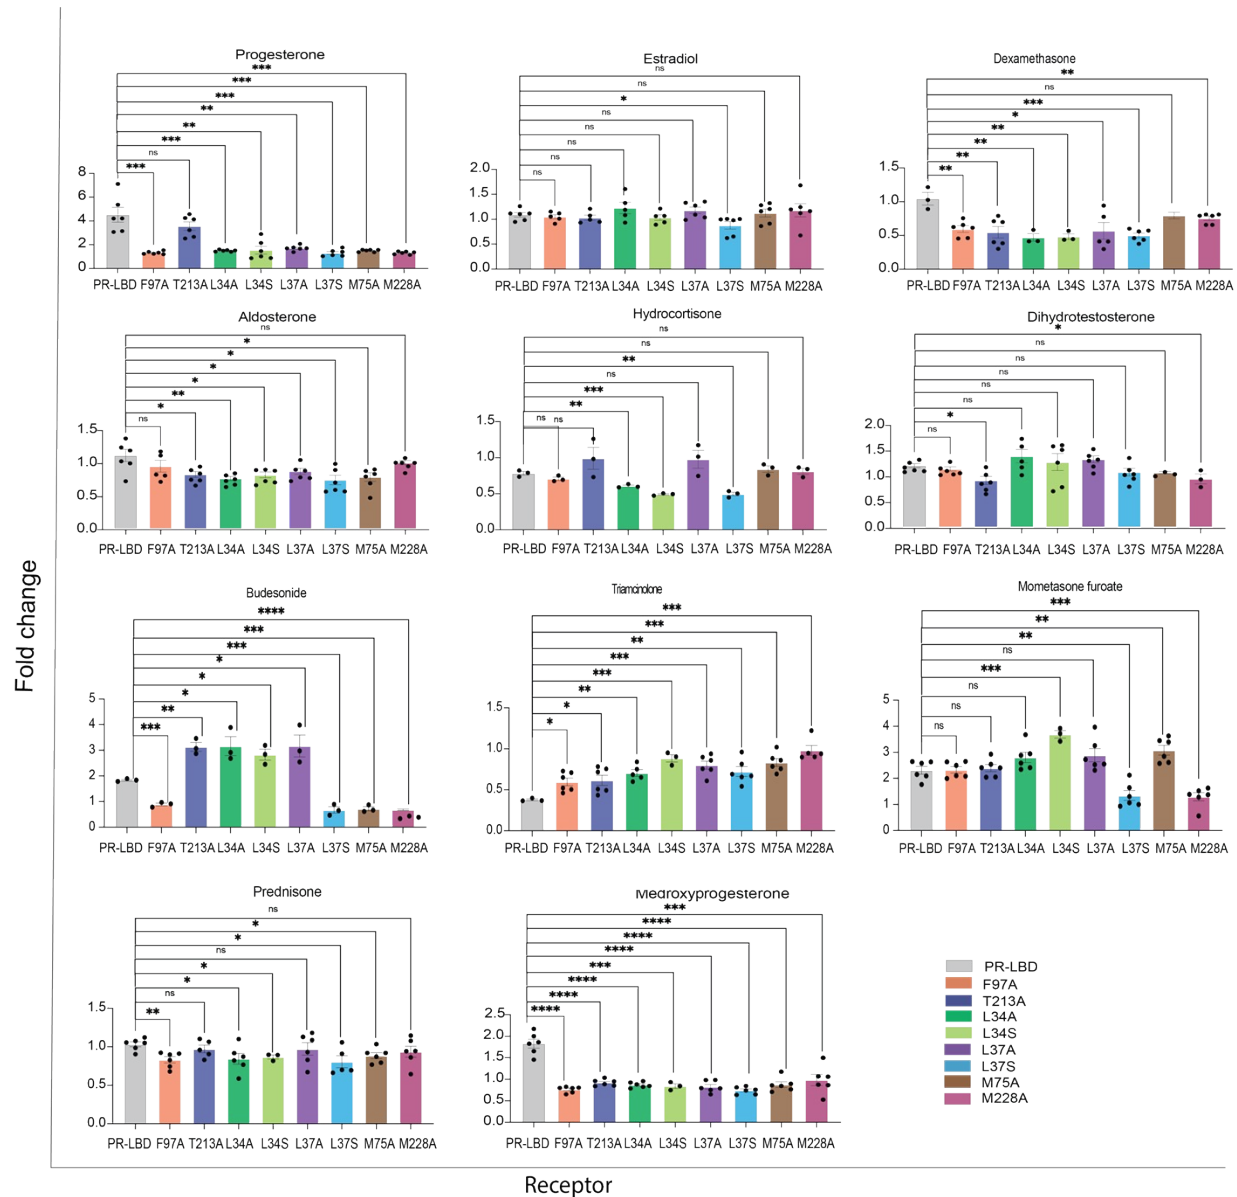

**Figure S6:** Comparison of the fold activation response of PR-LBD and Mutants at 1  $\mu$ M ligand concentration. Residue positions defined with respect to LBD only: F97A (Phe778Ala), T213A (Thr894Ala), M75A (Met756Ala), L34A (Leu715Ala), L34S (Leu34Ser), L37A (Leu718A), L37S (Leu718Ser), M75A (Met756Ala), M228A (Met909Ala).

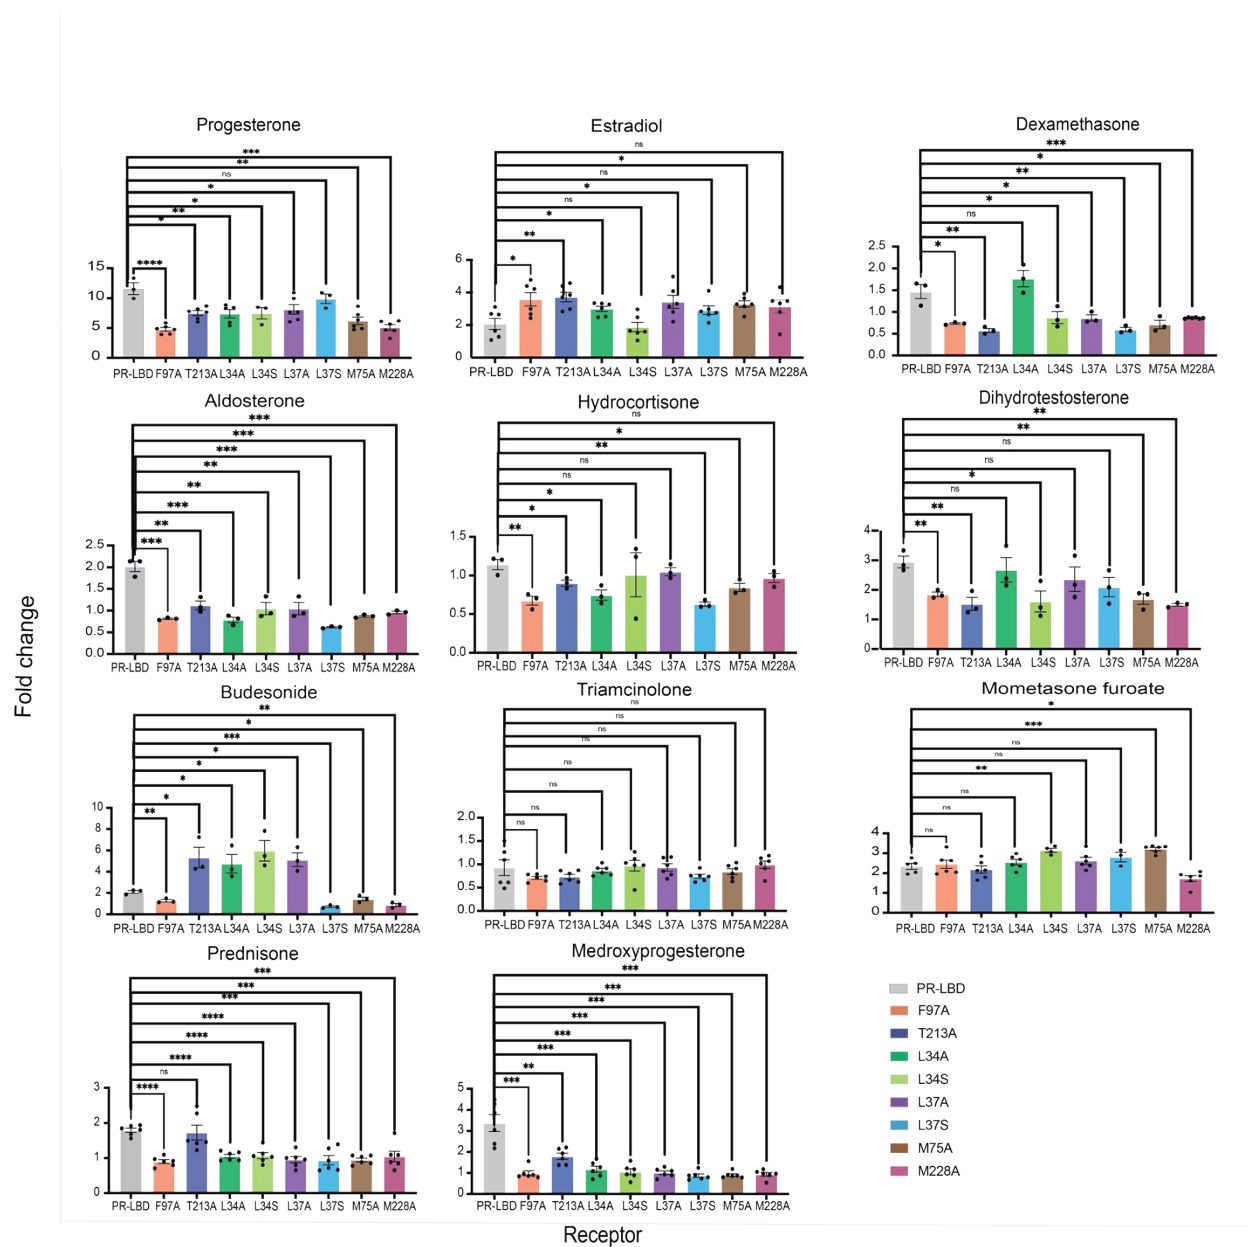

**Figure S7:** Comparison of the fold activation response of PR-LBD and Mutants at 10  $\mu$ M ligand concentration. Residue positions are the same as in Figure S7.

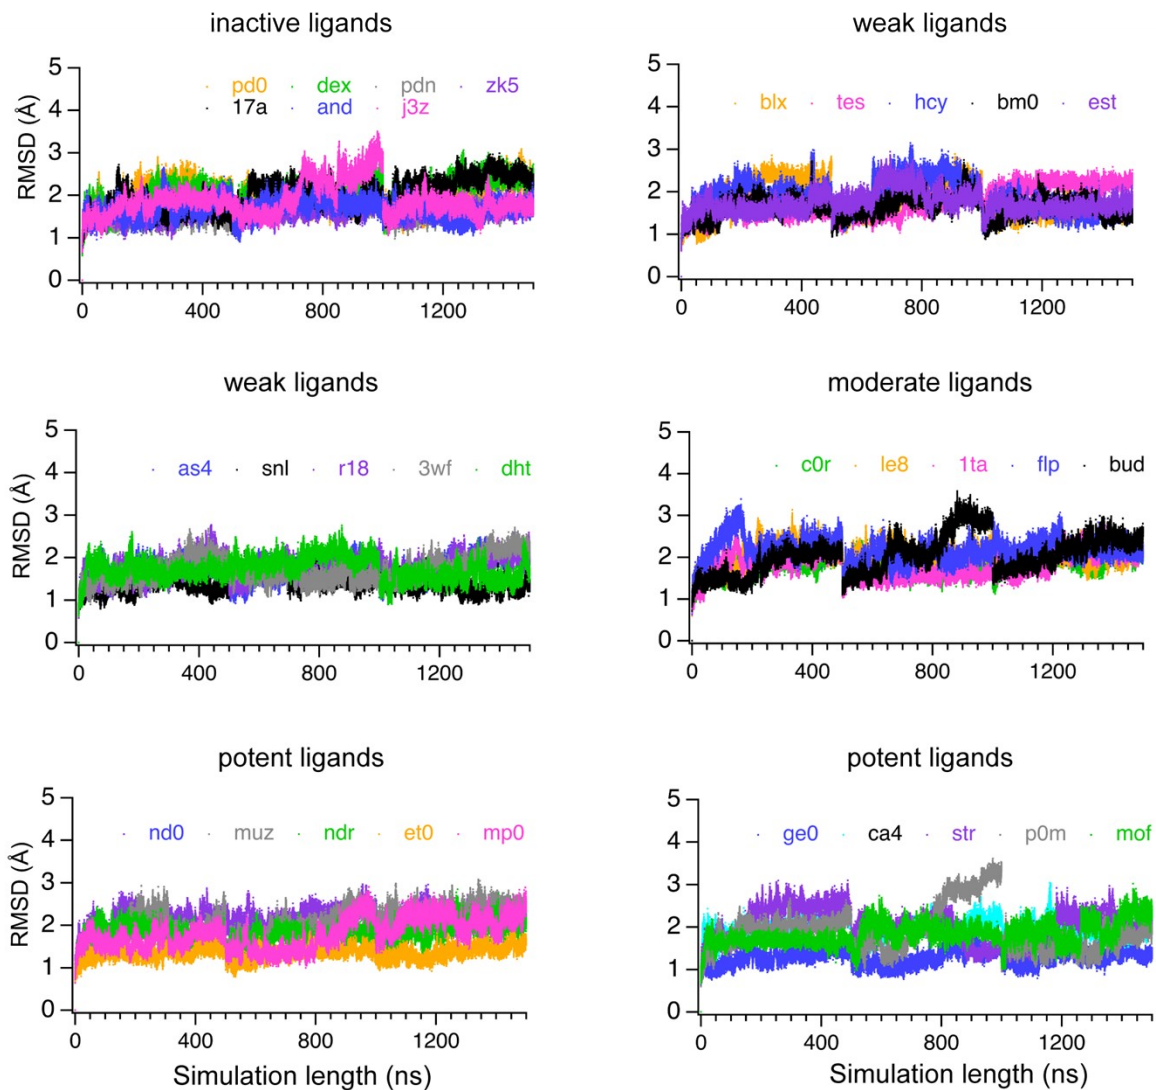

**Figure S8.** Root mean square deviation (RMSD) plots of all PR complexes. Simulations were performed in triplicate. Each graph represents 3 500-ns segments.
